# Supplementary material for: Carbonic anhydrases are influenced by the size and symbiont identity of the aggregating sea anemone Anthopleura elegantissima
Source: Oxford University Press journal article supplement (doi:10.1242/jeb.221424), 2020-01-01
Supplement: jeb221424supp.pdf [file jeb221424supp.pdf]

SUPPLEMENTARY INFORMATION

SUPPLEMENTARY FIGURES

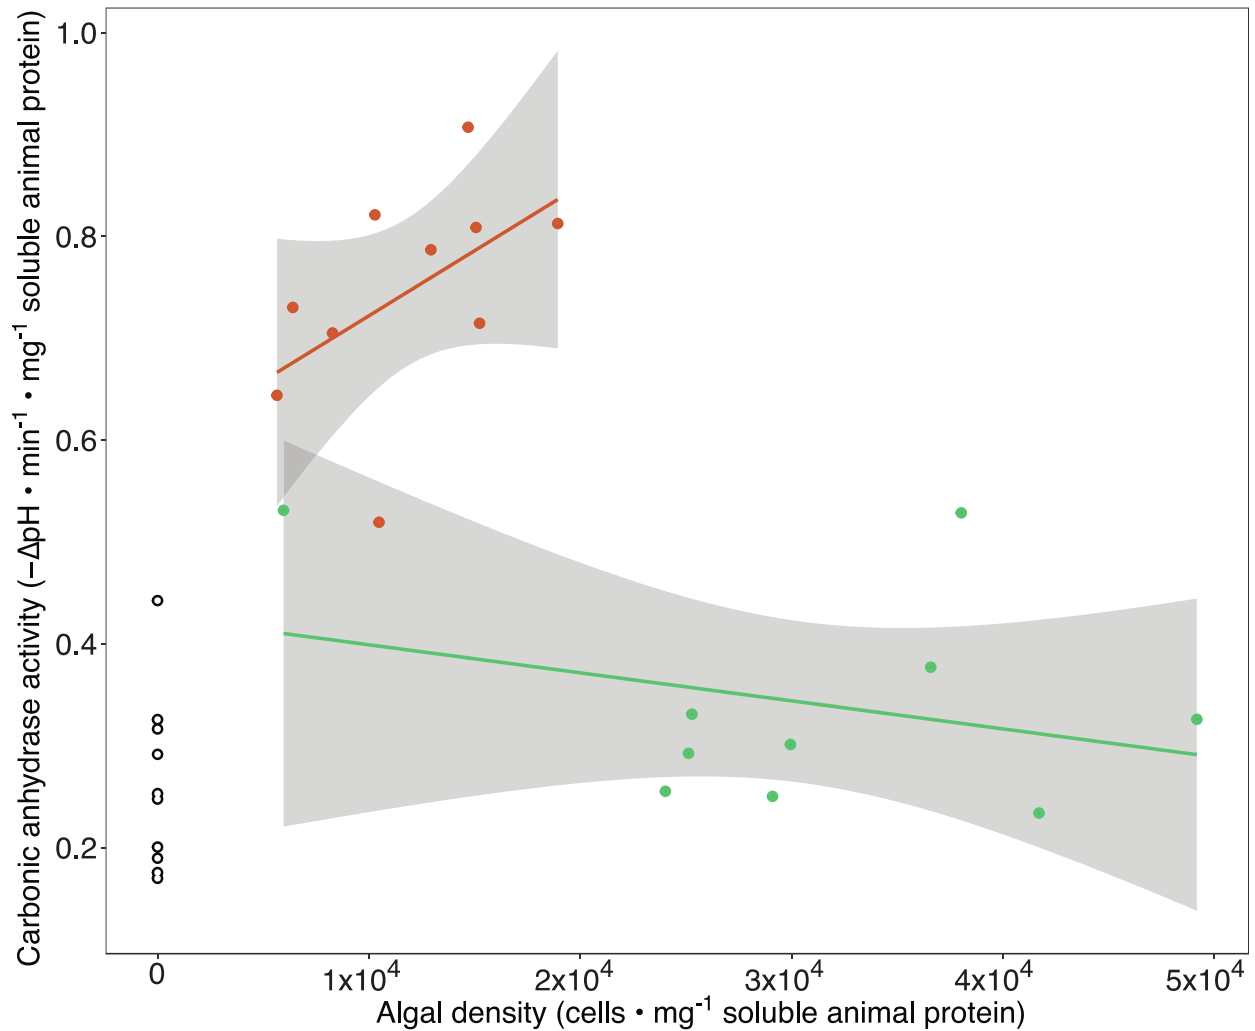

Figure S1. The relationship between algal density and CA activity from field-collected brown, green, and aposymbiotic *A. elegantissima*. Each point is the average of triplicate technical replicates. Colors: brown = brown, green = green, aposymbiotic = white. A linear model was fit for each set of symbiotic states in the data indicated by a brown or green line (brown:  $y = 0.000001278x + 0.5942$ , adjusted  $R^2 = 0.1626$ ,  $F = 2.748$ ,  $p = 0.136$ ; green:  $y = -0.0000002752x + 0.4266$ , adjusted  $R^2 = -0.02078$ ,  $F = 0.8168$ ,  $p = 0.3925$ ) with standard error of the model represented by the extent of the gray region around each line. There is no linear model for the aposymbiotic anemones since all individuals had no algae present.

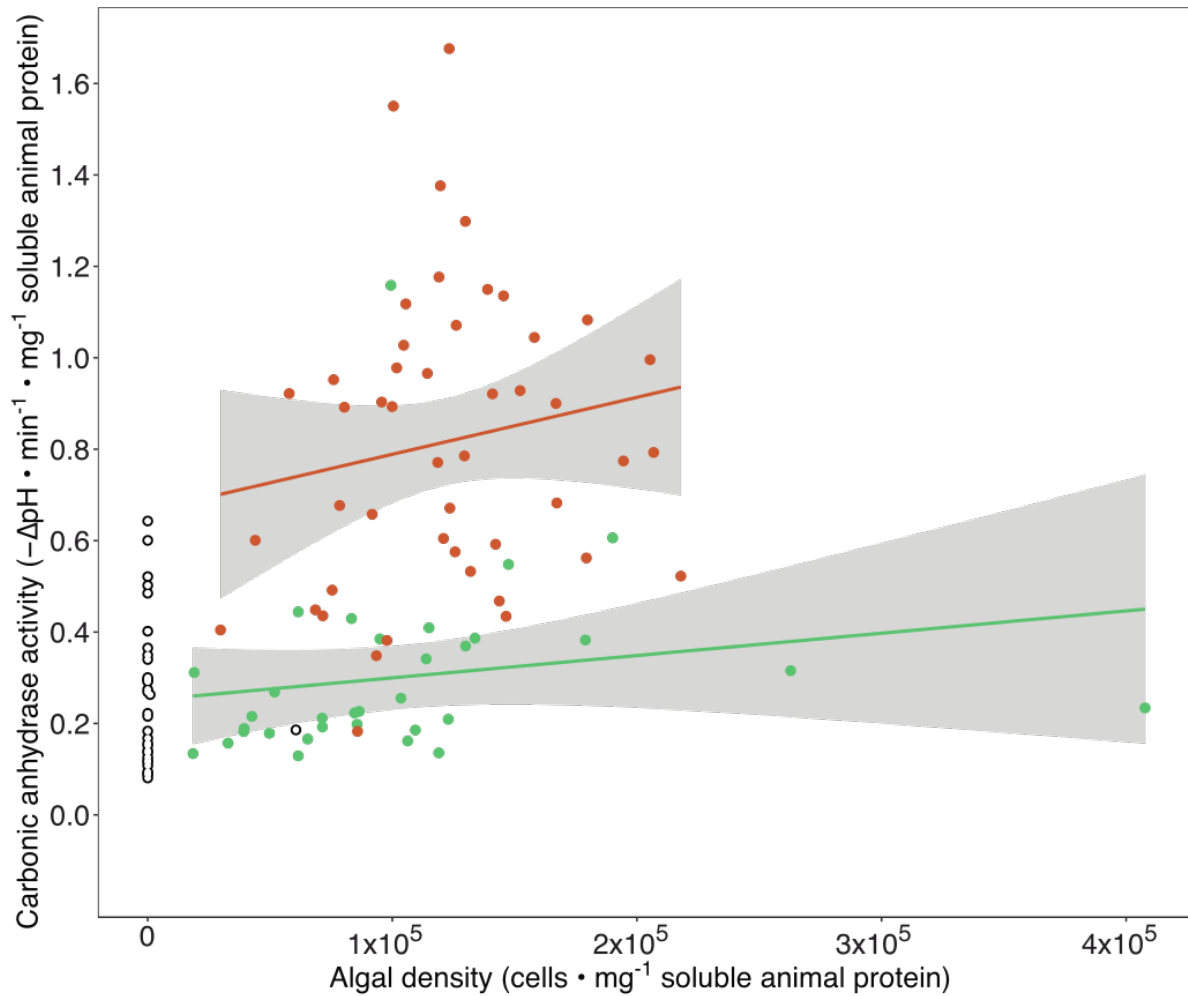

Figure S2. The relationship between algal density and CA activity from the light experiment. Each point is the average of triplicate CA and quadruplicate algal count technical replicates. Colors: brown = brown, green = green, aposymbiotic = white. A linear model was fit for brown and green states in the data indicated by a brown or green line, respectively. (brown:  $y = 0.000001247x + 0.6641$ , adjusted  $R^2 = 0.005193$ ,  $F = 1.24$ ,  $p = 0.2714$ ; green:  $y = 0.0000004882x + 0.2509$ , adjusted  $R^2 = 0.003974$ ,  $F = 1.128$ ,  $p = 0.296474$ ) with standard error of the model represented by the extent of the gray region around each line. There is no linear model for the aposymbiotic anemones because all individuals except one had no algae present.

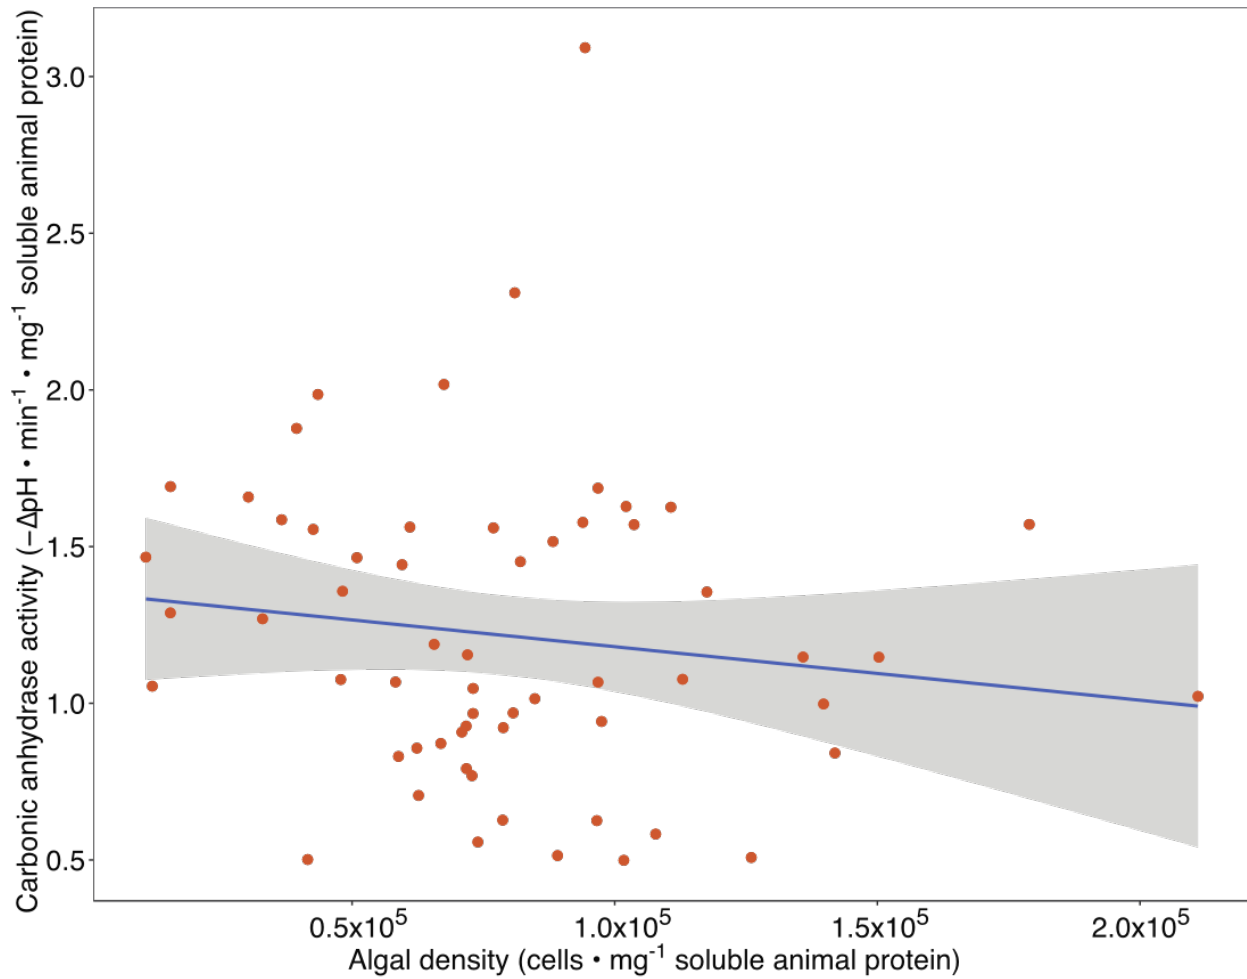

Figure S3. The relationship between algal density and CA activity from field-collected brown *A. elegantissima* of different sizes. Each point is the average of triplicate technical replicates. A linear model was fit to the data indicated by the blue line ( $y = -0.0000017x + 1.4$ , adjusted  $R^2 = 0.0014$ ,  $F = 1.082$ ,  $p = 0.303$ ) with standard error of the model represented by the extent of the gray region around the line.

## SUPPLEMENTARY TABLES

Table S1. Nucleotide and amino acid sequences for AeleCAs used in this study. Signal peptides, where present, are highlighted yellow and were excluded from phylogenetic analyses. Signal peptide with transmembrane regions, where present, are highlighted blue.

| Gene | Nucleotide sequences | Protein sequences | Signal peptide? | Transmembrane domain? |
|------|----------------------|-------------------|-----------------|-----------------------|
|------|----------------------|-------------------|-----------------|-----------------------|

| <i>AeleCA</i> | Nucleotide:                                   | Amino acid (frame 1, open reading frame 2 frame 1): | Y | N |
|---------------|-----------------------------------------------|-----------------------------------------------------|---|---|
| 1             | CTTCCGATCTACTTTGCATAAGCTAGCGTCGACTGCTGTTTGTTC |                                                     |   |   |
|               | CTGCAGAGCTGAGATCCACAACACTCACTTGTAACCAAGATAT   | MAAPKWGYGPNNGPSKWAKD                                |   |   |
|               | TGAGATGGCTGCACCAAAATGGGGTTATGGTCCTAATAACGGGC  | FPAAAGARQSPIDIKTHDAQHDS                             |   |   |
|               | CTTCAAAATGGGCCAAGGATTTCCTGCAGCCGAGGGGCACG     | ALKIKPLKIQYSQGNDFNVTNNG                             |   |   |
|               | CCAATCACCGATCGACATCAAACACATGATGCTCAACATGACA   | YSLVISRKTSEGNLSGGPLEHNY                             |   |   |
|               | GTGCACTCAAATAAAGCCCTTGAAAATCCAATACAGCCAGGGA   | RFEQFHFHWGKTSGSGSEHLLD                              |   |   |
|               | AACGACTTCAATGTCACCAATAATGGCTACTCTTTGGTCATATCG | GKAFPAELHLVHWNTDLFSSFGE                             |   |   |
|               | CGCAAGACCAGTGAAGGGACTAACTTGAGTGGTGGGCCGTTG    | AASSKNGLAVLGFVQIGGESAG                              |   |   |
|               | GAACATAACTACCGCTTTGAGCAGTTTCATTTCCACTGGGGAAA  | LKITDMPQVQVQNGDKQDLKVP                              |   |   |
|               | GACATCTGGAAGTGGCTCGGAGCATTGCTGGATGAAAAGCC     | FNLSSLLPSNTNDYWYSGSLTTP                             |   |   |
|               | TTTCCTGCAGAGCTTCATCTTGTCTACTGGAACACAGATCTCTTC | PCYESVSWFVKEPIHATENQM                               |   |   |
|               | AGCAGTTTTGGCGAAGCGCGCTCGAGTAAGAATGGCCTGGCTG   | QQFRSLKANDGGCIVDNYRPVM                              |   |   |
|               | TGCTTGGTGCCTTTGTGCAAAATGGTGGTGAAAGTGTGGTCTG   | DGSGRNVRSFE*                                        |   |   |
|               | AAGACGATCACCGACATGATCCCCAAGTCCAGAATATTGGCGA   |                                                     |   |   |
|               | CAAACAAGACCTTAAGGTTCCCTTCAACTTATCGTCGTTGCTACC |                                                     |   |   |
|               | AAGTAACACTAATGACTACTGGACCTACAGTGGTCCCTCACCCAC |                                                     |   |   |
|               | CCCTCCCTGCTATGAAAGTGTCTCCTGGTTCGTTTTCAAGGAGC  |                                                     |   |   |
|               | CAATCCACGCAACGGAGAATCAGATGCAGCAGTTCGTTCACTC   |                                                     |   |   |
|               | AAGGCCAACGATGGTGGATGTATAGTGACAACACTACAGACCAG  |                                                     |   |   |
|               | TCATGGATGGTAGTGGACGCAACGTCAGGGCTTCTTTGAGTGA   |                                                     |   |   |
|               | AAAGTTTGGCATGAAAAATTAGAAACAACTCTCGTAATTCTGA   |                                                     |   |   |
|               | CCTTGAAAAGAACGAATGATCGAGGAACGTAGGAAGTATAGTT   |                                                     |   |   |
|               | GTAATTTGTAGCCGAGATGAAGGCTTTTAGAATCTATAGAAATGT |                                                     |   |   |
|               | TGTAACAAGAGAGACAGCAATAAATATGAATTTGCCAAAAA     |                                                     |   |   |

| Ae1eCA | Nucleotide:                                    | Amino acid (frame 3 reverse, | N | Y |
|--------|------------------------------------------------|------------------------------|---|---|
| 4      | TGTTGCTTACCAAGCTTGAAATATATTATTAATGAATGCAAAT    | open reading frame 13 frame  |   |   |
|        | AATGTCAGTACAGAAGAAAACATGCTGGAAAACCAGCAGACA     | 3):                          |   |   |
|        | AATGCAAAGTTTGGGAAAATCCCATATAGTTGTACCTTTCGCTG   | MKTFFSPRNMAINLSLSCVLILAL     |   |   |
|        | CTTGCAATCACATCACCATACTGCATTTAGAGCTTGGTATAAGA   | VQPMLGASNSFNYNVTDTKYGP       |   |   |
|        | CATGCAACAAGCAACAATACCTTCACCAACCTTTCTAAAATAGC   | LGWAKTFPSFCNGSSQSPIDIEAS     |   |   |
|        | TGTTTATCGGACAACCTCGATTACAACAAGACTGCTGCCGCACA   | KTEYDASLEKLTCLKFNTVPTGAK     |   |   |
|        | GCGGACAGAATGTTGTCATGGTGGCGGTCACGAGATAAGATT     | FNVSNNHGSYTVFFTPNTFLVSK      |   |   |
|        | CGCTGTCTGGTCCCTTATGATCAGCTGCAGTCTGAAGCTTCTTT   | GGLPGTFTTLQFHFHWGSENNK       |   |   |
|        | TGACGACACGAGAATTCAGAGGTTCAACGGGACGGAAGGTGT     | GSEHTVDGTYPAELHFVNFNTK       |   |   |
|        | CGGTTAGAACACCTCTATCGTTGCTTTTAGGCTTCGAAGCATGT   | YSNIGEAVKQEDGLAVLGVIFKV      |   |   |
|        | CGAGCTGAGCTTGGGAGATTGTAGCGTAGTTCTTAAAGACGGT    | GTTENTALTSFLKYALNVTHPSSK     |   |   |
|        | CCAAGTGACAACCTCGTTACAAGTTGGTGTGTCAAACTACCCT    | VTGLSMTNNLASLLPTNITDFYR      |   |   |
|        | TGTACCTGTAGAAGTCAGTGATGTTGGTGGGAGTAAAGATGCC    | YKGSLLTPCNEVVWTWTFKNYA       |   |   |
|        | AGGTTGTTGGTCATAGACAAACAGTTACTTTACTAGATGGGTG    | TISQAQLDMLRSLKDNDRGVLTG      |   |   |
|        | AGTCACATTGAGTGCCTACTTCAAAAAGGACGTCAGAGCTGTAT   | TFRPVEPLNSRVVKRSFKTAADH      |   |   |
|        | TTTCGGTTGTACCAACCTTGAAGATGACGCCTAAAACCTGCAAGT  | KGPDESSEYLVATMTTILSAVTAA     |   |   |
|        | CCATCTCTTGTGTTTACGGCTTCACCTATGTTTGAGTACTTTGTGT | VLL*                         |   |   |
|        | TGAAGTTCACAAAATGCAACTCAGCCGGTACTTTGTCCCATCC    |                              |   |   |
|        | ACGGTGTGTTCAGATCCCTTATTGTTTTACTACCCAGTGGAAA    |                              |   |   |
|        | TGAAACTGGAGAGTGGTGAAGTACCTGGTAACCTCCTTTGG      |                              |   |   |
|        | ACACGAGGAATGTGTTGGGTGTAAGAACAACCTGTATAGGAATG   |                              |   |   |
|        | ACCATTGTTAGATACATTAATTTGCCCCAGTGGGAACAGTGT     |                              |   |   |
|        | GAATTTGGTCAGGGTGAAGTTTTTCCAACCTGCGTCGTATTGAG   |                              |   |   |
|        | TTTTAGAGGCTTCAATGTCGATGGGCGACTGGCTTGAACCGTTA   |                              |   |   |
|        | CAAAAGCTTGGAAACGTTTTAGCCAGCCAAGAGGACCATACT     |                              |   |   |
|        | TGGTATCTGTGACATTGTAATTGAAACTATTAGAAGCCCAAGCA   |                              |   |   |
|        | TAGGTTGAACCAATGCCAAAATAAGTACACAACCTTAGTGAAGA   |                              |   |   |
|        | TTTATTGCCATGTTTCGTTGAGAGAAAAAGTTTTTCATTAAGCA   |                              |   |   |
|        | AAAATTACCTTTCCGGTATCGTATCTGGTTATTCTGTCTTTTTCTG |                              |   |   |
|        | TTTTCTTTTGGCTTCATATAGCTAGTGATTATAGTGTTCAGTTG   |                              |   |   |
|        | TCCATAACTGTTGATTAGACTATTATACTATTCTGCTGCTGGAG   |                              |   |   |

| Ae1eCA | Nucleotide:                                                                                                                                                                                                                                                                                                                                                                                                                                                                                                                                                                                                                                                                                                                                                                                                                                                                                                                                                                                                                                                                                                                                                                                                                                                                                                                                                                                                                                                                                                                                                                                                                                                       | Amino acid (frame 3 reverse,                                                                                                                                                                                                                                                                                                                                                                                                                        | Y | N |
|--------|-------------------------------------------------------------------------------------------------------------------------------------------------------------------------------------------------------------------------------------------------------------------------------------------------------------------------------------------------------------------------------------------------------------------------------------------------------------------------------------------------------------------------------------------------------------------------------------------------------------------------------------------------------------------------------------------------------------------------------------------------------------------------------------------------------------------------------------------------------------------------------------------------------------------------------------------------------------------------------------------------------------------------------------------------------------------------------------------------------------------------------------------------------------------------------------------------------------------------------------------------------------------------------------------------------------------------------------------------------------------------------------------------------------------------------------------------------------------------------------------------------------------------------------------------------------------------------------------------------------------------------------------------------------------|-----------------------------------------------------------------------------------------------------------------------------------------------------------------------------------------------------------------------------------------------------------------------------------------------------------------------------------------------------------------------------------------------------------------------------------------------------|---|---|
| 6      | <p>ATATTCCAAATTCAGAACATACCAAATGATCCTCGTGTTC</p> <p>ACGCTTCTCAAACCTTTTCGTGTTTGATTGATGAGAAACGAAC</p> <p>AGATAAGTAAACTTTTCACTAATATTTCTCTACTTTTAATCAGT</p> <p>AGTCATGATTTTATTCTGACACTTTTCATTCGTGCAGTGTTACTC</p> <p>TTCGCCCGTTGAGGGGTAGGGTAGGTCTGTAGTTGTTGCACATT</p> <p>TTGCCGTGATGGTAGCCATGTGTAGCCTGGAGGGCTCTGAAATT</p> <p>ATTCAGAAATTTCTGGTCAGCAGTGATAGGAGTTCTGAGCACTAT</p> <p>CCATCGAACAGACTCGTAACATCCAGGGGTGGTCAGGGATCCCT</p> <p>TGTATGTGTAGTATGATCTACCACCAGACGATAGACCACCAACCA</p> <p>AGCTATCGAGTCTGACGGCAACTCCAGCTTTCTGAGATCCTTCT</p> <p>GTTATTATTGCATTCAAATTCAGTGAAAACGTCTTAAGTTCTGGT</p> <p>GCTCCAGAAGATCCCTTCTCAGGAAAGCACCAATCACTGTCAA</p> <p>GCCGTCTGATTTGGTGGCAGCGGTGGAGATGTCGCCATATTTGG</p> <p>CGTTATAGAACACCAAGTGAAGCTCTCCTGGGTAAGATCTGCCA</p> <p>TTGATTGTGTGCTCCGAACCAACATTATCAGTACATCCGAAATGG</p> <p>AAGTGAAACTGAGCAAGGATATATTTCTGACCATTAAGTGGATTA</p> <p>TATACACTTGCACTACCTTTCTCAACGTTGAAAGTTGGTGAATGC</p> <p>CCATTGTTGACCAGAGTTCCTTTGACCGTCCCCAATAACTGA</p> <p>AACCTTACACGCAGTGGACGGAGTGCATATCATCACCATCTTT</p> <p>GACTTTAGCACGGACGATGTTTACTGGAGATTGGGAACGAGCA</p> <p>TTGCAATCCTTGATACGTGACCCAGTCTGATGGTCCATACACT</p> <p>TGACCATAAGTCTTGCCATAACCCCAAGAACCGGCTGAGGATGC</p> <p>CAGGCCAAAGAATCCAGCACTCAACACTATGATCTGCATCAACA</p> <p>TCATCGTTTTCTTAATATTCATGAGAAACGTCGTAATATCGAA</p> <p>GTAATAAGGACAAGGTGTTGAGCGTGATGGCGATAAAGTT</p> <p>TGTGTTGAGTGCTGGATTCTTTGGCCTGGCATCCTCAGCCGGTT</p> <p>CTTGGGGTTATGGCAAGACTTATGGTCAAGTGATGGACCATCA</p> <p>GACTGGGGTCACGTATCCAAGGATTGCAATGCTCGTTCCCAATC</p> <p>TCCAGTAAACATCGTCCGTGCTAAAGTCAAAGATGGTGATGATAT</p> <p>CGACCTCCGTCCACTGCGTGAAGGTTTCAGTATTATTGGGGGA</p> <p>CGGTCAAAGGAACCTGGTCAACAATGGGCATTCAACCAACTTTC</p> | <p>open reading frame 13 frame</p> <p>3):</p> <p>MMLMQIIVLSAGFFGLASSAGS</p> <p>WGYGKTYGQVYGPSDWGHVSK</p> <p>DCNARSQSPVNIVRAKVKDGGD</p> <p>IDLRPLRVRFQYYWGTVKGTLVN</p> <p>NGHSPTFNVEKGSASVYNPVG</p> <p>QKYILAQFHFHGCTDNVGEHT</p> <p>INGRSYPGELHLVFYNAKYGDIST</p> <p>AATKSDGLTVIGAFLLKKGSSGAPE</p> <p>LKTFSLNLNAIITEGSQKAGVAVR</p> <p>LDSLVGGLSSGGRSYTYKGSLLT</p> <p>PGCYESVRWIVLRTPITADQEILN</p> <p>NFRALQATHGYHHGKMCNNYR</p> <p>PTLPLNGRRVTLHE*</p> |   |   |

| Ae1eCA | Nucleotide:                                    | Amino acid (frame 3, open | N | N |
|--------|------------------------------------------------|---------------------------|---|---|
| 9      | AGGAACTAAGGTAGAGGTAAGTGCATCATCTTTCATTGAATTGTT  | reading frame 1 frame 3): |   |   |
|        | CAACAGAAGTCTCAAATACAAGGATGGCAAACACATTTCTAATT   | LHHLSLNCSTEVSNTRMANTFLIF  |   |   |
|        | TTCCTAACAGCAGCAATTTTCAAGTCTCGCTGAGTGTGATTAC    | LTAAIFQVLSVDYNYELSDTTYG   |   |   |
|        | AATTATGAACCTTCAGACACCACCTATGGTCTCTTGGTTGGCCC   | PLGWPKTYNPSCDGSRQSPINIK   |   |   |
|        | AAAACATACAATCCATCCTGTGACGGCTCCAGACAATCACCAATC  | PSDASYDGLGELSFKNYNLPVD    |   |   |
|        | AACATTAAGCCTTCAGATGCTAGCTATGATGGCTCGTTGGGAGA   | SVLKLGNNGKSYRVFFEPNTYTIS  |   |   |
|        | GCTGAGTTTCAAGAACTATAACCTTCTGTGATTCCGTGCTCAA    | GGGLPGTFYTHNFHFHWGAAN     |   |   |
|        | GCTTGAAACAATGGCAAATCCTACAGAGTGTCTTGAACCCA      | TKGSEHTIDGKKFPELHFVNVN    |   |   |
|        | ATACGTACACGATATCCGGAGGAGGGCTGCCTGGTACTTTCTAC   | TKYATVAEALQKDGIAAVGILYE   |   |   |
|        | ACACATAACTTTCATTCCACTGGGGTGCAGCTAACACCAAGGG    | VGDEDLALEPFLKYTANVTYKRDI  |   |   |
|        | ATCTGAGCATACTATTGATGGAAAGAAGTCCCACTTGAGCTCCA   | SNVTVMAQALQTLQPNTTDFY     |   |   |
|        | TTTTGTTAATGTCAACACAAAGTACGCAACTGTTGCAGAAGCTT   | RYNGSLTTPNCQEVVWTWTFKN    |   |   |
|        | TACAACAGAAAGATGGGATGTCAGCAGTGGGCATCCTATACGA    | YRTISQAQLDMLRSLRATNNVT    |   |   |
|        | GGTTGGCGACGAAGATAGCGCTTGAACCTTTCTAAAATACA      | MLVDTRFVPLPLGSRVVKTFHT    |   |   |
|        | CAGCTAATGTGACTTACAAAAGGGACATCTCGAATGTGACCGTG   | SHGEAYHVTNTMTIIAFVVMAM    |   |   |
|        | ATGGCTCAAGCCCTACAGACCCTTCTACCCAAAACACCACTGA    | VMSK*                     |   |   |
|        | CTTCTATAGATATAACGGGTCTCTGACAACCCCAACTGCCAAGA   |                           |   |   |
|        | AGTTGTCACATGGACTGTGTTAAGAACTATCGAACAATCTCCCA   |                           |   |   |
|        | AGCACAGCTGGATAGCTTCAAGTCTTAGAGCCACAAACAACG     |                           |   |   |
|        | TAACCATGCTGGTAGACACATTCGCCCTGTTCTACCTTAGGTT    |                           |   |   |
|        | CTCGTGTGTTAAGAAAACCTTTCACACCAGCCATGGAGAAGCG    |                           |   |   |
|        | TATCACGTGACTAACCCATGACGATTATTGCGTTCGTGTCATG    |                           |   |   |
|        | GCAATGGTTATGTCCAAGTAGTTTACATTTTTTTGATGTAGTTT   |                           |   |   |
|        | GTTTGTAGCTTTTCAAGTCAAGGCTTTATCATTAAACTGATAAG   |                           |   |   |
|        | CGCTTCAAAAAGCAATTTTCTACTTTCACATTCCTCAATACGTTAC |                           |   |   |
|        | AGTTTTTGGGTAACCAGGTTAAAAACAGCCGCAATTATTATGCT   |                           |   |   |
|        | GAAGACTGATCAGAAGATGTTAGAAATGCATCTCATAATATAAGA  |                           |   |   |
|        | AACAAACCAGAAACAAAAGAAAGAAATTTGCATATTTGGAAAA    |                           |   |   |
|        | CTTTTGATATCTCTGCAACAAATTGATATATCAACAAACTGTAAAC |                           |   |   |
|        | GCTATCTGACTTTTTAAAACAACCTTCCAAGTTACAGTAAAAC    |                           |   |   |
|        | TTGAAGCAAAAATTTTCGTTTTAATTCATATAAATTTGATGAAAT  |                           |   |   |



Table S2. Primers for qPCR experiments.

| Gene name      | Transcriptome identifier | qPCR primers                               |
|----------------|--------------------------|--------------------------------------------|
| <i>AeleCA6</i> | comp404_c4_seq3          | Forward: 5'-ACC AGA GTT CCT TTG ACC GTC-3' |
|                |                          | Reverse: 5'-CTG GGG TCA CGT ATC CAA GG-3'  |
| <i>AeleCA9</i> | Comp2502_c1_seq3         | Forward: 5'-TCG ATT CCG TGC TCA AGC TT-3'  |
|                |                          | Reverse: 5'-ATC CCT TGG TGT TAG CTG CA-3'  |
| <i>AeleCA4</i> | comp34611_c0_seq1        | Forward: 5'-TAC AAC AAG ACT GCT GCC GT-3'  |
|                |                          | Reverse: 5'-CTT CCG TCC CGT TGA ACC TC-3'  |
| <i>AeleCA1</i> | comp7398_c0_seq2         | Forward: 5'-CGC CAA TCA CCG ATC GAC AT-3'  |
|                |                          | Reverse: 5'-TTC ACT GGT CTT GCG CGA TA-3'  |
| <i>G3PD</i>    |                          | Forward: 5'-AGA GGC CTT CTT CAC AGC AC-3'  |
|                |                          | Reverse: 5'-GTT GGC AAG GTC ATC CCA GA-3'  |
| <i>NADH</i>    |                          | Forward: 5'-ATG GGA TTT GCT GGT CCA CT-3'  |
|                |                          | Reverse: 5'-TGG GTA GAC AGG TTC ATC GT-3'  |
